# Supplementary material
Source: HighWire-hosted journal article supplement (https://bmjopenquality.bmj.com/highwire/filestream/135942/field_highwire_adjunct_files/0/ds2756.docx)
Supplement: ds2756.docx [file ds2756.docx]

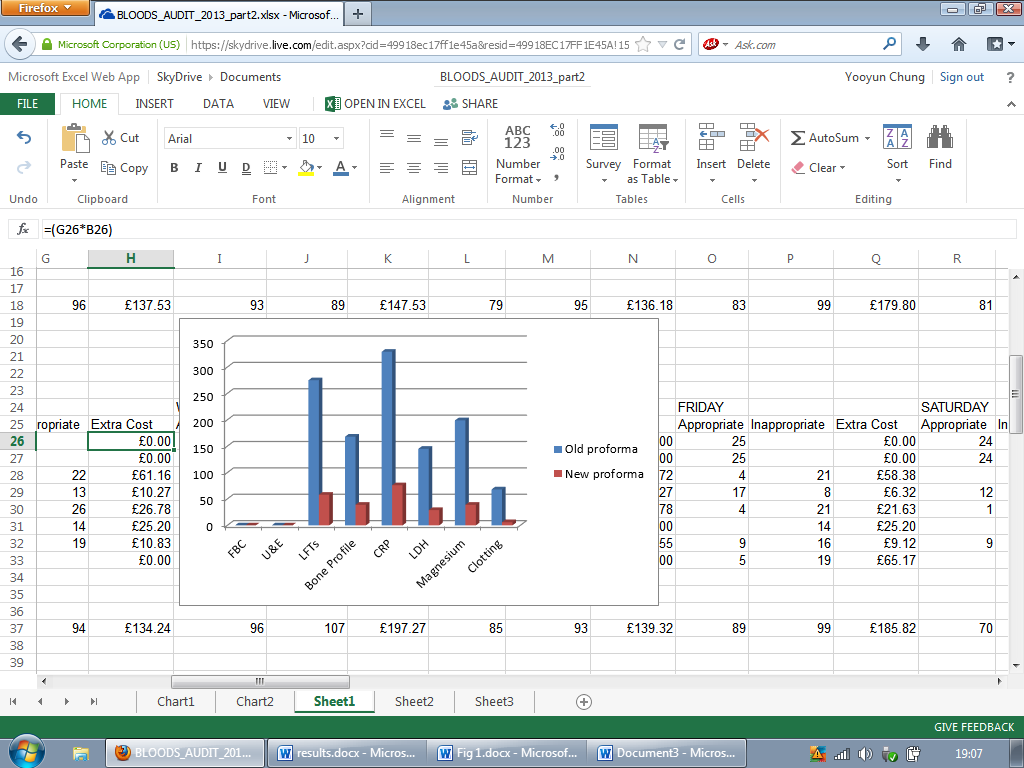


Fig 2. Comparing the number of inappropriate blood tests done before and after the introduction of the new proforma.
